# Supplementary material for: “Mixed Reality” in patient education prior to abdominal aortic aneurysm repair
Source: Atypon-hosted journal article supplement (doi:10.1024/0301-1526/a001062), 2023-03-09
Supplement: 0301-1526_a001062_esm2.pdf [file 0301-1526_a001062_esm2.pdf]

## Electronic supplementary material

### ESM 2. Technical specifications of the Magic Leap One Head-mounted Display

---

| <b>Technical Specifications</b> |                        |
|---------------------------------|------------------------|
| Field of view (width)           | 50°                    |
| Resolution                      | 1.3M pixels per eye    |
| Refresh rate                    | 120 Hz                 |
| Colors supported                | 16.8m                  |
| Weight                          | 316g                   |
| RAM                             | 8 GB                   |
| Memory/Storage                  | 128 GB                 |
| OS                              | Lumin OS               |
| Battery                         | 3.5 hrs.               |
| Charging/Data                   | USB-C PD 2.0 compliant |

---
