# Supplementary material for: “Mixed Reality” in patient education prior to abdominal aortic aneurysm repair
Source: Atypon-hosted journal article supplement (doi:10.1024/0301-1526/a001062), 2023-03-09
Supplement: 0301-1526_a001062_esm3.pdf [file 0301-1526_a001062_esm3.pdf]

# Electronic supplementary material

## ESM 3. Informational Gain Questionnaire (IGQ)

|                           |  |
|---------------------------|--|
| Subject ID                |  |
| Date of Birth             |  |
| Date of Patient Education |  |

### 1. What is an aneurysm?

*(Please select one answer)*

|     |                                            |                          |
|-----|--------------------------------------------|--------------------------|
| a.) | Balloon-like enlargement of a major artery | <input type="checkbox"/> |
| b.) | Occlusion of a major artery                | <input type="checkbox"/> |
| c.) | Large defect/hole in a major artery        | <input type="checkbox"/> |
| d.) | I don't know/ I can't remember.            | <input type="checkbox"/> |

### 2. Why was I recommended to undergo surgery on my aneurysm?

*(Please select one answer)*

|     |                                                                                       |                          |
|-----|---------------------------------------------------------------------------------------|--------------------------|
| a.) | To lower my blood pressure and consequently lower the risk of the aneurysm rupturing. | <input type="checkbox"/> |
| b.) | To reduce the risk of dying from blood loss due to rupture of the aneurysm.           | <input type="checkbox"/> |
| c.) | To prevent a stroke.                                                                  | <input type="checkbox"/> |
| d.) | I don't know/ I can't remember.                                                       | <input type="checkbox"/> |

### 3. What statement is correct about the postoperative period following open aneurysm repair?

*(Please select one answer)*

|     |                                                                                                          |                          |
|-----|----------------------------------------------------------------------------------------------------------|--------------------------|
| a.) | I am not allowed to lift heavy objects for the first few months after the operation to prevent a hernia. | <input type="checkbox"/> |
| b.) | I am no longer allowed to do any sports (e.g., swimming) under any circumstances whatsoever.             | <input type="checkbox"/> |
| c.) | The inserted vascular prosthesis needs to be replaced in all cases after 10 years.                       | <input type="checkbox"/> |
| d.) | I don't know/ I can't remember.                                                                          | <input type="checkbox"/> |

### 4. Which of the following organs' location is closest to the operating field?

*(Please select one answer)*

|     |                                 |                          |
|-----|---------------------------------|--------------------------|
| a.) | Spleen                          | <input type="checkbox"/> |
| b.) | Intestine                       | <input type="checkbox"/> |
| c.) | Heart                           | <input type="checkbox"/> |
| d.) | I don't know/ I can't remember. | <input type="checkbox"/> |

### 5. Which of the following surgical access techniques is commonly used for endovascular aneurysm repair?

*(Please select one answer)*

|     |                                                                                |                          |
|-----|--------------------------------------------------------------------------------|--------------------------|
| a.) | Minimally invasive means that no incision or puncture of vessels is necessary. | <input type="checkbox"/> |
| b.) | Via a long longitudinal incision on the abdomen.                               | <input type="checkbox"/> |
| c.) | Via small incisions or punctures of vessels in the groin area.                 | <input type="checkbox"/> |
| d.) | I don't know/ I can't remember.                                                | <input type="checkbox"/> |

## Electronic supplementary material

**6. Which of the following statements is generally true for endovascular aneurysm repair? (Please select one answer)**

|     |                                                                                                                                      |                          |
|-----|--------------------------------------------------------------------------------------------------------------------------------------|--------------------------|
| a.) | I usually must stay longer in hospital after the minimally invasive surgical method than after the "open surgery".                   | <input type="checkbox"/> |
| b.) | I must come back to the clinic for follow-up care more often after the minimally invasive surgical method than after "open surgery". | <input type="checkbox"/> |
| c.) | The minimally invasive method has no disadvantages compared to "open surgery".                                                       | <input type="checkbox"/> |
| d.) | I don't know/ I can't remember.                                                                                                      | <input type="checkbox"/> |

**7. Which of the following complications can occur following endovascular aneurysm repair? (Please select one answer)**

|     |                                                                                                                                                                              |                          |
|-----|------------------------------------------------------------------------------------------------------------------------------------------------------------------------------|--------------------------|
| a.) | Acute circulatory shock due to an allergic reaction (e.g. to latex, drugs, X-ray contrast media, disinfectants) is very common and occurs in at least one in three patients. | <input type="checkbox"/> |
| b.) | Due to the minimally invasive surgical method, there are no major complications.                                                                                             | <input type="checkbox"/> |
| c.) | Postoperative bleeding and bruising at the catheter insertion site may occur.                                                                                                | <input type="checkbox"/> |
| d.) | I don't know/ I can't remember.                                                                                                                                              | <input type="checkbox"/> |

**8. Which of the following statements is correct with regards to the follow-up protocol following endovascular aneurysm repair? (Please select one answer)**

|     |                                                                                                                                         |                          |
|-----|-----------------------------------------------------------------------------------------------------------------------------------------|--------------------------|
| a.) | Control examinations after the operation are generally only recommended if acute complaints are present at the time.                    | <input type="checkbox"/> |
| b.) | Control examinations are necessary on a regular basis to detect changes in the stent prosthesis or the vessels at an early stage.       | <input type="checkbox"/> |
| c.) | Due to the special nature of the stent prosthesis and the particularly gentle surgical technique, a check-up is generally not required. | <input type="checkbox"/> |
| d.) | I don't know/ I can't remember.                                                                                                         | <input type="checkbox"/> |

**9. Which of the following statements comparing endovascular with open aneurysm repair is correct? (Please select one answer)**

|     |                                                                                                                 |                          |
|-----|-----------------------------------------------------------------------------------------------------------------|--------------------------|
| a.) | With the minimally invasive surgical method, there is a higher exposure to X-rays than with the "open surgery". | <input type="checkbox"/> |
| b.) | In the "open" operation, there is a higher exposure to X-rays than in the minimally invasive operation method.  | <input type="checkbox"/> |
| c.) | Both methods only use ultrasound.                                                                               | <input type="checkbox"/> |
| d.) | I don't know/ I can't remember.                                                                                 | <input type="checkbox"/> |
