# Supplementary material for: “Mixed Reality” in patient education prior to abdominal aortic aneurysm repair
Source: Atypon-hosted journal article supplement (doi:10.1024/0301-1526/a001062), 2023-03-09
Supplement: 0301-1526_a001062_esm4.pdf [file 0301-1526_a001062_esm4.pdf]

## Electronic supplementary material

### ESM 4. Mixed Reality Usability Questionnaire (MRUQ)

|                           |  |
|---------------------------|--|
| Subject ID                |  |
| Date of Birth             |  |
| Date of Patient Education |  |

|                                                                                                                | Strongly agree           | Agree                    | Rather agree             | Rather disagree          | Disagree                 | Strongly disagree        |
|----------------------------------------------------------------------------------------------------------------|--------------------------|--------------------------|--------------------------|--------------------------|--------------------------|--------------------------|
| 1. The handling of the HMD was impractical.                                                                    | <input type="checkbox"/> |
| 2. The handling of the HMD made me feel uncomfortable (e.g., dizziness, headache, nausea).                     | <input type="checkbox"/> |
| 3. The HMD helped me to better understand my disease.                                                          | <input type="checkbox"/> |
| 4. The HMD helped me to better understand complications that can be associated with the procedure.             | <input type="checkbox"/> |
| 5. I feel like the use of the HMD during patient education is unnecessary.                                     | <input type="checkbox"/> |
| 6. In the future I would prefer if patient education in other specialties would also be performed using a HMD. | <input type="checkbox"/> |
