# Supplementary material for: “Mixed Reality” in patient education prior to abdominal aortic aneurysm repair
Source: Atypon-hosted journal article supplement (doi:10.1024/0301-1526/a001062), 2023-03-09
Supplement: 0301-1526_a001062_esm5.pdf [file 0301-1526_a001062_esm5.pdf]

## Electronic supplementary material

### ESM 5. Patient Satisfaction Questionnaire (PSQ)

|                           |  |
|---------------------------|--|
| Subject ID                |  |
| Date of Birth             |  |
| Date of Patient Education |  |

|                                                                                        | Strongly agree           | Agree                    | Rather agree             | Rather disagree          | Disagree                 | Strongly disagree        |
|----------------------------------------------------------------------------------------|--------------------------|--------------------------|--------------------------|--------------------------|--------------------------|--------------------------|
| 1. I felt time pressure.                                                               | <input type="checkbox"/> |
| 2. The explanations were easy to follow.                                               | <input type="checkbox"/> |
| 3. Some of my questions remained unanswered.                                           | <input type="checkbox"/> |
| 4. I felt sufficiently informed.                                                       | <input type="checkbox"/> |
| 5. I would have preferred a more descriptive form of patient education.                | <input type="checkbox"/> |
| 6. I do not feel sufficiently informed about potential complications of the procedure. | <input type="checkbox"/> |
| 9. Overall, I was pleased with the patient education process.                          | <input type="checkbox"/> |
